# Supplementary material
Source: PubMed Central journal article supplement (PMC11112194)
Supplement: sj-pdf-1-jfm-10.1177_1098612X14558893.pdf [file sj-pdf-1-jfm-10.1177_1098612X14558893.pdf]

## Appendix 1

### Simple descriptive scale for sedation

| Score | Classification    | Descriptors                                                                      |
|-------|-------------------|----------------------------------------------------------------------------------|
| 0     | No sedation       | Cat bright, alert, responsive, moving around                                     |
| 1     | Mild sedation     | Cat relaxed, but can be roused and can walk with little or no ataxia             |
| 2     | Moderate sedation | Cat in sternal or lateral recumbency, but can be roused, obvious signs of ataxia |
| 3     | Profound sedation | Cat recumbent and no response to stimulation                                     |

## Appendix 2

Simple descriptive scale for ease of intravenous catheter placement after premedication

| Score | Classification | Descriptors                                                                                             |
|-------|----------------|---------------------------------------------------------------------------------------------------------|
| 0     | Very difficult | Impossible to perform IV catheterisation or cat requires a lot of restraint, multiple attempts required |
| 1     | Difficult      | Cat requires good restraint, trying to move                                                             |
| 2     | Easy           | Minimal restraint required                                                                              |
| 3     | Very easy      | Cat recumbent and not responding to stimulation                                                         |

Appendix 3

Simple descriptive scale for recovery after general anaesthesia

| Score | Classification | Descriptors                                                                                                                                                                                             |
|-------|----------------|---------------------------------------------------------------------------------------------------------------------------------------------------------------------------------------------------------|
| 0     | Poor           | Cat shows major signs of excitement during recovery to sternal recumbency such as thrashing in the cage or moving around rapidly unaware of surroundings, growling; does not respond to gentle handling |
| 1     | Moderate       | Cat shows some signs of excitement during recovery to sternal recumbency such as thrashing in cage or moving around rapidly unaware of surroundings, growling; responds to gentle                       |

|   |           |                                                                                                 |
|---|-----------|-------------------------------------------------------------------------------------------------|
|   |           | handling by calming down                                                                        |
| 2 | Good      | Mild signs of excitement such as growling which resolve quickly so that the animal becomes calm |
| 3 | Excellent | Cat is calm and relaxed during recovery                                                         |
